# Supplementary material for: Fermented noni (Morinda citrifolia L.) fruit juice improved oxidative stress and insulin resistance under the synergistic effect of Nrf2/ARE pathway and gut flora in db/db mice and HepG2 cells
Source: Royal Society of Chemistry journal article supplement (doi:10.1039/d2fo00595f), 2022-01-01
Supplement: d2fo00595f1.pdf [file d2fo00595f1.pdf]

## Supplementary information

Table 1. The main macronutrients and micronutrients in fermented noni fruit juice (FNJ).

Table 2. The main phytochemical compounds in FNJ.

Table 3. The main nutrient compositions of db/db mouse diet.

Table 4. The qPCR primer sequences.

Figure 1 The representative chromatogram of phytochemical compounds in FNJ.

Table 1. The main macronutrients and micronutrients in fermented noni fruit juice (FNJ).

| No. | Nutrient      | Content (g/kg)        |
|-----|---------------|-----------------------|
| 1   | Total protein | 5.90                  |
| 2   | Glutamic acid | 0.48                  |
| 3   | Aspartic acid | 0.59                  |
| 4   | Threonine     | 0.14                  |
| 5   | Serine        | 0.12                  |
| 6   | Glycine       | 0.18                  |
| 7   | Alanine       | 0.24                  |
| 8   | Valine        | 0.25                  |
| 9   | Isoleucine    | 0.18                  |
| 10  | Leucine       | 0.24                  |
| 11  | Tyrosine      | 0.13                  |
| 12  | Phenylalanine | 0.12                  |
| 13  | Lysine        | 0.15                  |
| 14  | Histidine     | 0.03                  |
| 15  | Arginine      | 0.19                  |
| 16  | Proline       | 0.16                  |
| 17  | K             | 1.88                  |
| 18  | Mg            | 0.12                  |
| 19  | Na            | 0.15                  |
| 20  | Ca            | 0.05                  |
| 21  | P             | 0.25                  |
| 22  | Fe            | $3.33 \times 10^{-3}$ |
| 23  | Mn            | $1.22 \times 10^{-3}$ |
| 24  | Zn            | $0.64 \times 10^{-3}$ |
| 25  | Cu            | $0.09 \times 10^{-3}$ |
| 26  | Se            | $0.02 \times 10^{-3}$ |
| 27  | Pb            | $0.02 \times 10^{-3}$ |
| 28  | Vitamin C     | $3.76 \times 10^{-3}$ |

Table 2. The main phytochemical compounds in FNJ.

| No. | compound                                                                                           | Formula              | RT (min) |
|-----|----------------------------------------------------------------------------------------------------|----------------------|----------|
| 1   | 5-hydroxymethylfurfural                                                                            | $C_6H_6O_3$          | 3.20     |
| 2   | 2-furoic acid                                                                                      | $C_5H_4O_3$          | 4.16     |
| 3   | 3,4-dihydroscopoletin                                                                              | $C_{10}H_{10}O_4$    | 9.83     |
| 4   | 4-allyl-2-hydroxyphenyl<br>1-O- $\beta$ -D-apiosyl-(1 $\rightarrow$ 6)- $\beta$ -D-glucopyranoside | $C_{20}H_{28}O_{11}$ | 15.14    |
| 5   | scopoletin                                                                                         | $C_{10}H_8O_4$       | 16.54    |
| 6   | cyclo(D-Trp-D-Tyr)                                                                                 | $C_{20}H_{19}N_3O_3$ | 18.76    |

|   |                                                           |                                                               |       |
|---|-----------------------------------------------------------|---------------------------------------------------------------|-------|
| 7 | hexahydropyrazino[1',2':1,6]pyrido[3,4-b]indole-1,4-dione | C <sub>14</sub> H <sub>13</sub> N <sub>3</sub> O <sub>2</sub> | 22.12 |
| 8 | cyclo(L-Trp-N-methyl-L-Ala-)                              | C <sub>14</sub> H <sub>15</sub> N <sub>3</sub> O <sub>4</sub> | 22.70 |

Table 3. The main nutrient compositions of db/db mouse diet.

| No. | composition         | Content (%) |
|-----|---------------------|-------------|
| 1   | Moisture            | ≤10.0       |
| 2   | Crude protein       | ≥18.0       |
| 3   | Crude fat           | ≥4.0        |
| 4   | Crude fiber         | ≤5.0        |
| 5   | Crude ash           | ≤8.0        |
| 6   | Calcium             | 1.0-1.8     |
| 7   | Phosphorus          | 0.6-1.2     |
| 8   | Calcium: Phosphorus | 1.2:1-1.7:1 |
| 9   | Lysine              | ≥0.82       |
| 10  | Methionine          | ≥0.53       |

Table 4. The qPCR primer sequences.

| Primer         | Primer sequence (5' to 3') | Primer sequence (5' to 3')    |
|----------------|----------------------------|-------------------------------|
| <i>Nrf2</i> -F | M-CAGCCATGACTGATTTAAGCAG   | H-CCAGCACATCCAGTCAGAAACCAG    |
| <i>Nrf2</i> -R | M-CAGCTGCTTGTTTTCGGTATTA   | H-AGCCGAAGAAACCTCATTGTCATCTAC |
| <i>HO-1</i> -F | M-TCCTTGTACCATATCTACACGG   | H-CCTCCCTGTACCACATCTATGT      |
| <i>HO-1</i> -R | M-GAGACGCTTTACATAGTGCTGT   | H-GCTCTTCTGGGAAGTAGACAG       |
| <i>GPX1</i> -F | M-GTTTGAGAAGTGCGAAGTGAAT   | H-CCCTCTGAGGCACCACGGT         |
| <i>GPX1</i> -R | M-CGGAGACCAAATGATGTACTTG   | H-TAAGCGCGGTGGCGTCGT          |
| <i>JNK</i> -F  | M-TTGAAAACAGGCCTAAATACGC   | H-CCAGGACTGCAGGAACGAGT        |
| <i>JNK</i> -R  | M-GTTTGTTATGCTCTGAGTCAGC   | H-CCACGTTTTCTTGTAGCCC         |
| <i>IRS1</i> -F | M-GAGTTGAGTTGGGCAGAATAGG   | H-CAGCTCACCTTCTGTCAGG         |
| <i>IRS1</i> -R | M-CCTATCTGCATGGTCATGTAGT   | H-AGGTCCATCTTCATGTACTCC       |
| <i>AKT</i> -F  | M-TGCACAAACGAGGGGAATATAT   | H-TGACCATGAACGAGTTTGAGTA      |
| <i>AKT</i> -R  | M-CGTTCCCTGTAGCCAATAAAGG   | H-GAGGATCTTCATGGCGTAGTAG      |

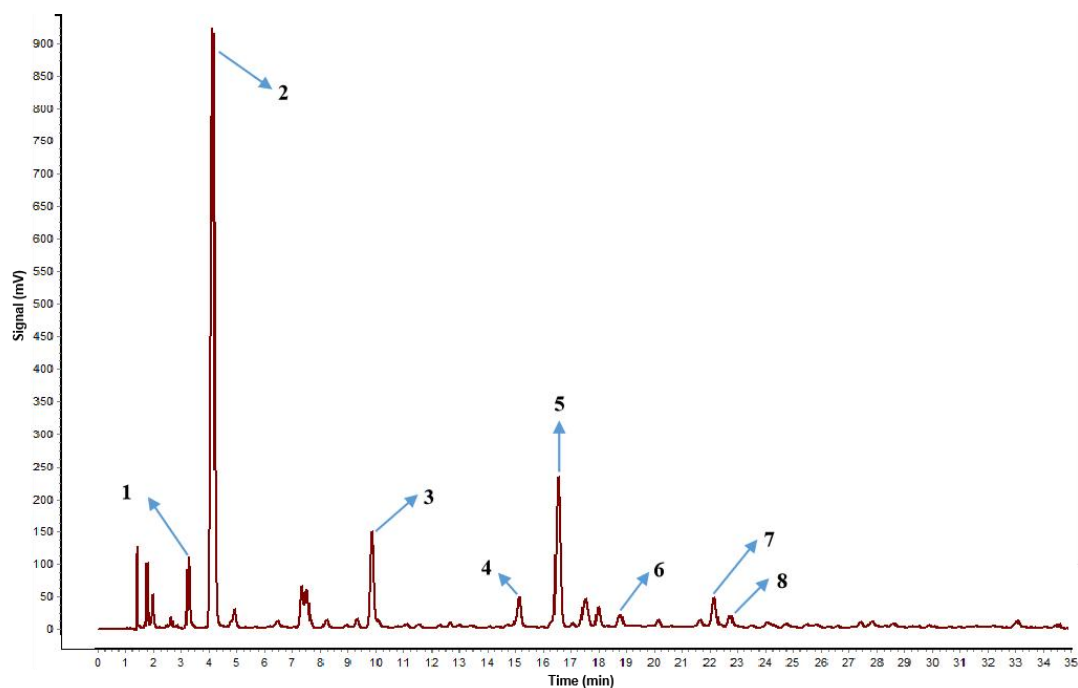

Figure 1 The representative chromatogram of phytochemical compounds in FNJ.

(1) 5-hydroxymethylfurfural. (2) 2-furoic acid. (3) 3,4-dihydroscopoletin. (4) 4-allyl-2-hydroxyphenyl 1-O- $\beta$ -D-apiosyl-(1 $\rightarrow$ 6)- $\beta$ -D-glucopyranoside. (5) scopoletin. (6) cyclo (D-Trp-D-Tyr). (7) hexahydropyrazino [1',2':1,6] pyrido [3,4-b] indole-1,4-dione. (8) cyclo (L-Trp-N-methyl-L-Ala-).
